# Supplementary material
Source: Royal Society of Chemistry journal article supplement (doi:10.1039/d6cp00101g)

### Support information

**Table S1.** The number of molecules in each system

| Type of peptides | Number of peptides | Number of sodium ions | Number of chloride ions | Number of water |
|------------------|--------------------|-----------------------|-------------------------|-----------------|
| ARG3             | 20                 | 10                    | 70                      | 17250           |
|                  | 40                 | 10                    | 130                     | 16879           |
|                  | 60                 | 10                    | 190                     | 16508           |
| ARG7             | 80                 | 10                    | 250                     | 16137           |
|                  | 20                 | 10                    | 150                     | 16644           |
|                  | 40                 | 10                    | 290                     | 15666           |
| ARG11            | 60                 | 10                    | 430                     | 14688           |
|                  | 80                 | 10                    | 570                     | 13711           |
|                  | 20                 | 10                    | 230                     | 16123           |
| LYS3             | 40                 | 10                    | 450                     | 14624           |
|                  | 60                 | 10                    | 670                     | 13126           |
|                  | 80                 | 10                    | 890                     | 11627           |
| LYS7             | 20                 | 10                    | 70                      | 17284           |
|                  | 40                 | 10                    | 130                     | 16947           |
|                  | 60                 | 10                    | 190                     | 16611           |
| LYS11            | 80                 | 10                    | 250                     | 16274           |
|                  | 20                 | 10                    | 150                     | 16743           |
|                  | 40                 | 10                    | 290                     | 15865           |
| ASN3             | 60                 | 10                    | 430                     | 14987           |
|                  | 80                 | 10                    | 570                     | 14109           |
|                  | 20                 | 10                    | 230                     | 16278           |
| ASN7             | 40                 | 10                    | 450                     | 14934           |
|                  | 60                 | 10                    | 670                     | 13590           |
|                  | 80                 | 10                    | 890                     | 12247           |
| ASN11            | 20                 | 10                    | 10                      | 17412           |
|                  | 40                 | 10                    | 10                      | 17202           |
|                  | 60                 | 10                    | 10                      | 16993           |
| GLN3             | 80                 | 10                    | 10                      | 16783           |
|                  | 20                 | 10                    | 10                      | 17138           |
|                  | 40                 | 10                    | 10                      | 16655           |
| GLN7             | 60                 | 10                    | 10                      | 16172           |
|                  | 80                 | 10                    | 10                      | 15689           |
|                  | 20                 | 10                    | 10                      | 16868           |
| GLN11            | 40                 | 10                    | 10                      | 16114           |
|                  | 60                 | 10                    | 10                      | 15361           |
|                  | 80                 | 10                    | 10                      | 14607           |
| GLN3             | 20                 | 10                    | 10                      | 17379           |
|                  | 40                 | 10                    | 10                      | 17136           |
|                  | 60                 | 10                    | 10                      | 16894           |
| GLN7             | 80                 | 10                    | 10                      | 16651           |
|                  | 20                 | 10                    | 10                      | 16993           |
|                  | 40                 | 10                    | 10                      | 16364           |
|                  | 60                 | 10                    | 10                      | 15735           |

---

|       |    |    |    |       |
|-------|----|----|----|-------|
|       | 80 | 10 | 10 | 15106 |
|       | 20 | 10 | 10 | 16650 |
| GLN11 | 40 | 10 | 10 | 15680 |
|       | 60 | 10 | 10 | 14709 |
|       | 80 | 10 | 10 | 13738 |
|       | 20 | 10 | 10 | 17261 |
| TRP3  | 40 | 10 | 10 | 16901 |
|       | 60 | 10 | 10 | 16541 |
|       | 80 | 10 | 10 | 16181 |
|       | 20 | 10 | 10 | 16609 |
| TRP7  | 40 | 10 | 10 | 15598 |
|       | 60 | 10 | 10 | 14586 |
|       | 80 | 10 | 10 | 13574 |
|       | 20 | 10 | 10 | 16094 |
| TRP11 | 40 | 10 | 10 | 14567 |
|       | 60 | 10 | 10 | 13040 |
|       | 80 | 10 | 10 | 11513 |
|       | 20 | 10 | 10 | 17364 |
| HIS3  | 40 | 10 | 10 | 17107 |
|       | 60 | 10 | 10 | 16849 |
|       | 80 | 10 | 10 | 16592 |
|       | 20 | 10 | 10 | 16922 |
| HIS7  | 40 | 10 | 10 | 16223 |
|       | 60 | 10 | 10 | 15523 |
|       | 80 | 10 | 10 | 14824 |
|       | 20 | 10 | 10 | 16541 |
| HIS11 | 40 | 10 | 10 | 15461 |
|       | 60 | 10 | 10 | 14381 |
|       | 80 | 10 | 10 | 13300 |
|       | 20 | 10 | 10 | 17472 |
| ALA3  | 40 | 10 | 10 | 17323 |
|       | 60 | 10 | 10 | 17174 |
|       | 80 | 10 | 10 | 17026 |
|       | 20 | 10 | 10 | 17277 |
| ALA7  | 40 | 10 | 10 | 16932 |
|       | 60 | 10 | 10 | 16587 |
|       | 80 | 10 | 10 | 16243 |
|       | 20 | 10 | 10 | 17102 |
| ALA11 | 40 | 10 | 10 | 16583 |
|       | 60 | 10 | 10 | 16064 |
|       | 80 | 10 | 10 | 15545 |
|       | 20 | 10 | 10 | 17368 |
| ILE3  | 40 | 10 | 10 | 17114 |
|       | 60 | 10 | 10 | 16861 |
|       | 80 | 10 | 10 | 16607 |
|       | 20 | 10 | 10 | 16927 |
| ILE7  | 40 | 10 | 10 | 16232 |
|       | 60 | 10 | 10 | 15538 |
|       | 80 | 10 | 10 | 14843 |

---

|       |    |     |    |       |
|-------|----|-----|----|-------|
|       | 20 | 10  | 10 | 16548 |
| ILE11 | 40 | 10  | 10 | 15475 |
|       | 60 | 10  | 10 | 14402 |
|       | 80 | 10  | 10 | 13329 |
| ASP3  | 20 | 70  | 10 | 17415 |
|       | 40 | 130 | 10 | 17208 |
|       | 60 | 190 | 10 | 17002 |
| ASP7  | 80 | 250 | 10 | 16795 |
|       | 20 | 150 | 10 | 17040 |
|       | 40 | 290 | 10 | 16459 |
| ASP11 | 60 | 430 | 10 | 15878 |
|       | 80 | 570 | 10 | 15297 |
|       | 20 | 230 | 10 | 16728 |
| GLU3  | 40 | 450 | 10 | 15834 |
|       | 60 | 670 | 10 | 14940 |
|       | 80 | 890 | 10 | 14047 |
| GLU7  | 20 | 70  | 10 | 17378 |
|       | 40 | 130 | 10 | 17136 |
|       | 60 | 190 | 10 | 16893 |
| GLU11 | 80 | 250 | 10 | 16650 |
|       | 20 | 150 | 10 | 16980 |
|       | 40 | 290 | 10 | 16339 |
| PVP3  | 60 | 430 | 10 | 15698 |
|       | 80 | 570 | 10 | 15057 |
|       | 20 | 230 | 10 | 16613 |
| PVP6  | 40 | 450 | 10 | 15604 |
|       | 60 | 670 | 10 | 14595 |
|       | 80 | 890 | 10 | 13586 |
| PV10  | 20 | 10  | 10 | 17393 |
|       | 40 | 10  | 10 | 17166 |
|       | 60 | 10  | 10 | 16938 |
|       | 80 | 10  | 10 | 16710 |
|       | 20 | 10  | 10 | 17096 |
|       | 40 | 10  | 10 | 16571 |
|       | 60 | 10  | 10 | 16047 |
|       | 80 | 10  | 10 | 15522 |
|       | 20 | 10  | 10 | 16740 |
|       | 40 | 10  | 10 | 15858 |
|       | 60 | 10  | 10 | 14977 |
|       | 80 | 10  | 10 | 14095 |

**Table. S2.** Intermolecular interaction energies of peptide-graphene and peptide-water in the system with polymerization degree 11 and peptide number 60 (Unit:  $\text{kJ}\cdot\text{mol}^{-1}$ )

|     | $E_{\text{vdW}}$ | $E_{\text{elec}}$ | $E_{\text{total}}(\text{peptide-graphene})$ | $E_{\text{vdW}}$ | $E_{\text{elec}}$ | $E_{\text{total}}(\text{peptide-water})$ |
|-----|------------------|-------------------|---------------------------------------------|------------------|-------------------|------------------------------------------|
| ARG | -1243            | 0                 | -1243                                       | -440             | -210687           | -211127                                  |
| LYS | -1085            | 0                 | -1085                                       | -4582            | -202978           | -207560                                  |
| ASN | -1635            | 0                 | -1635                                       | -7441            | -111567           | -119008                                  |
| GLN | -1520            | 0                 | -1520                                       | -9440            | -114649           | -124089                                  |
| TRP | -1668            | 0                 | -1668                                       | -19171           | -110300           | -129471                                  |
| HIS | -1392            | 0                 | -1392                                       | -10495           | -113713           | -124208                                  |
| ALA | -1137            | 0                 | -1137                                       | -7557            | -70145            | -77702                                   |
| ILE | -1297            | 0                 | -1297                                       | -12023           | -77017            | -89040                                   |
| ASP | -556             | 0                 | -556                                        | 2983             | -319809           | -316826                                  |
| GLU | -568             | 0                 | -568                                        | 2629             | -314694           | -312065                                  |
| PVP | -1098            | 0                 | -1098                                       | -15110           | -47370            | -62480                                   |

**Fig. S1.** Displacement of the centroids of adjacent graphenes in the yz plane during NVT

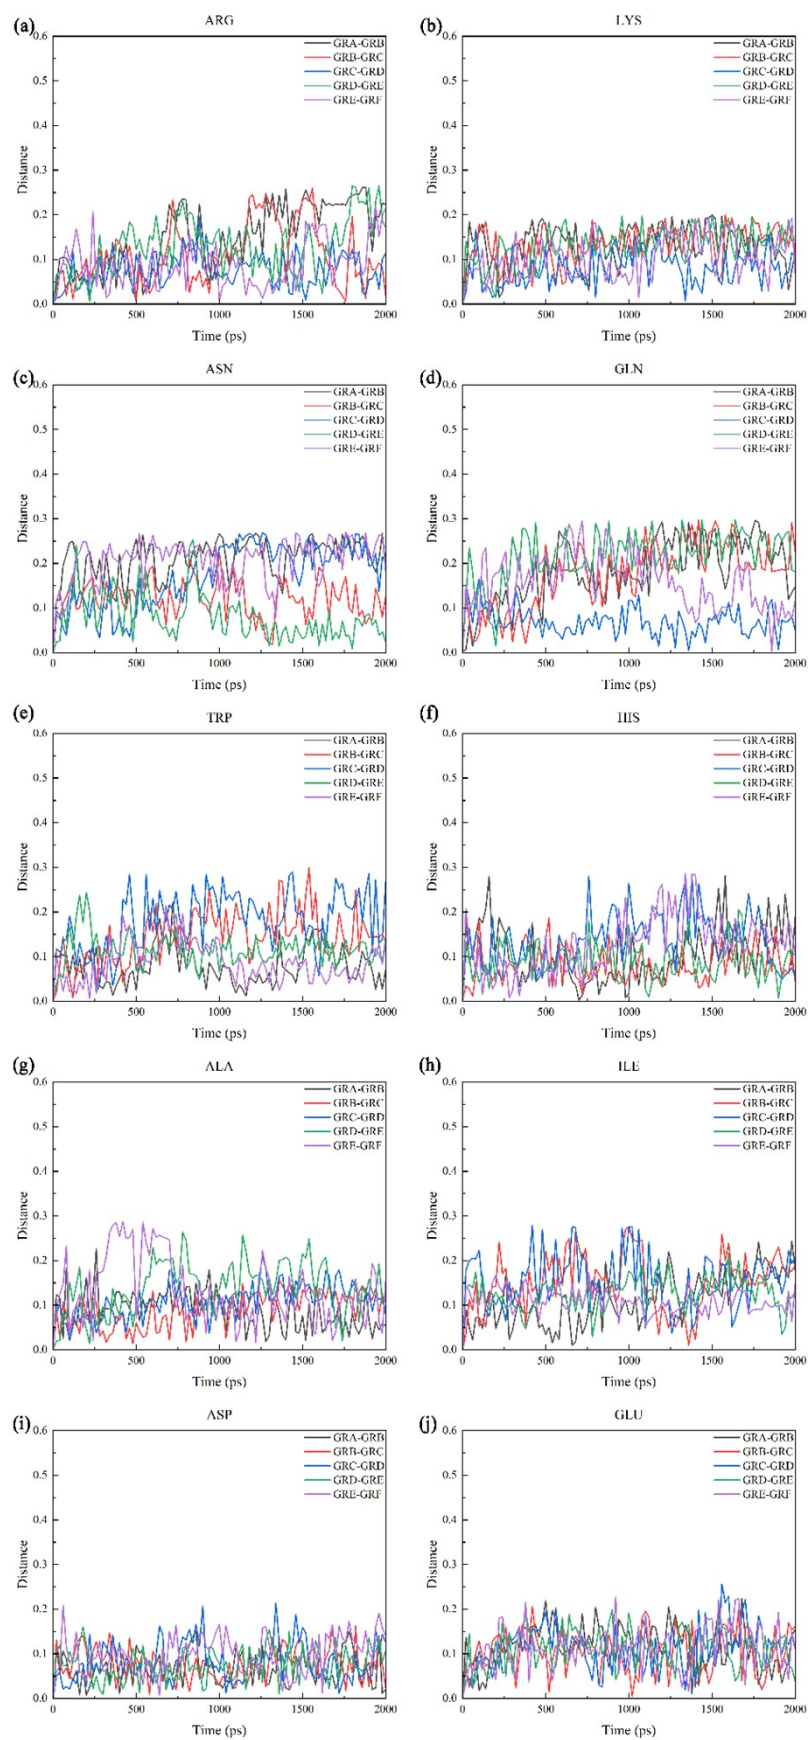

**Fig. S2.** Monomer structures of different peptides (a)ARG (b)LYS (c)ASN (d)GLN (e)HIS (f)TRP (g)ALA (h) ILE (i)ASP (j) GLU

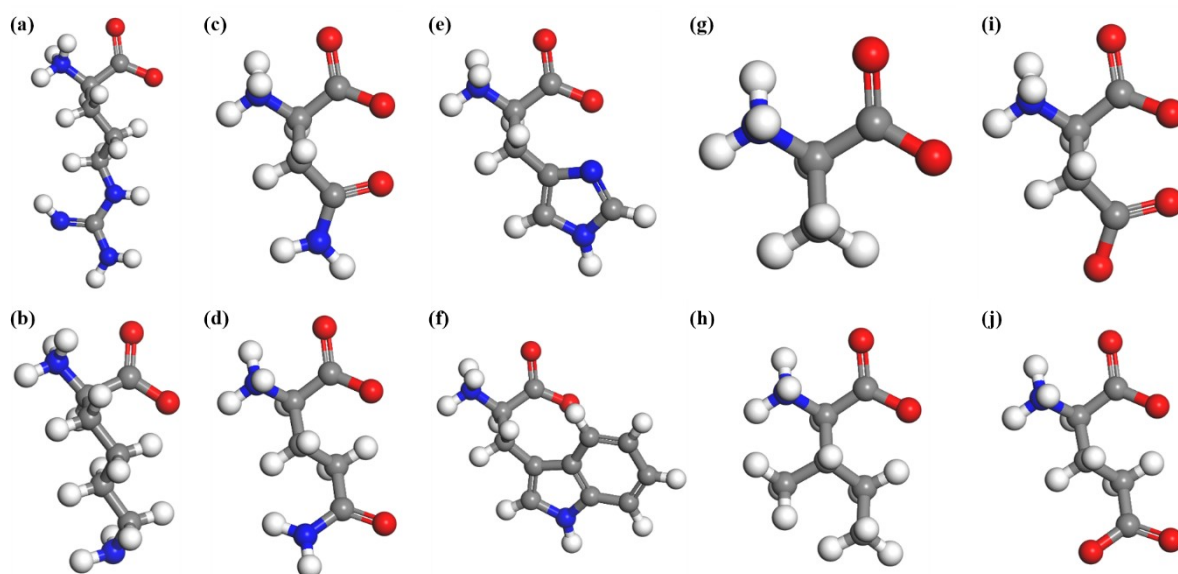

**Fig. S3.** Schematic diagram of the radial distribution function (RDF) of different atom pairs in the peptide-graphene-water system.

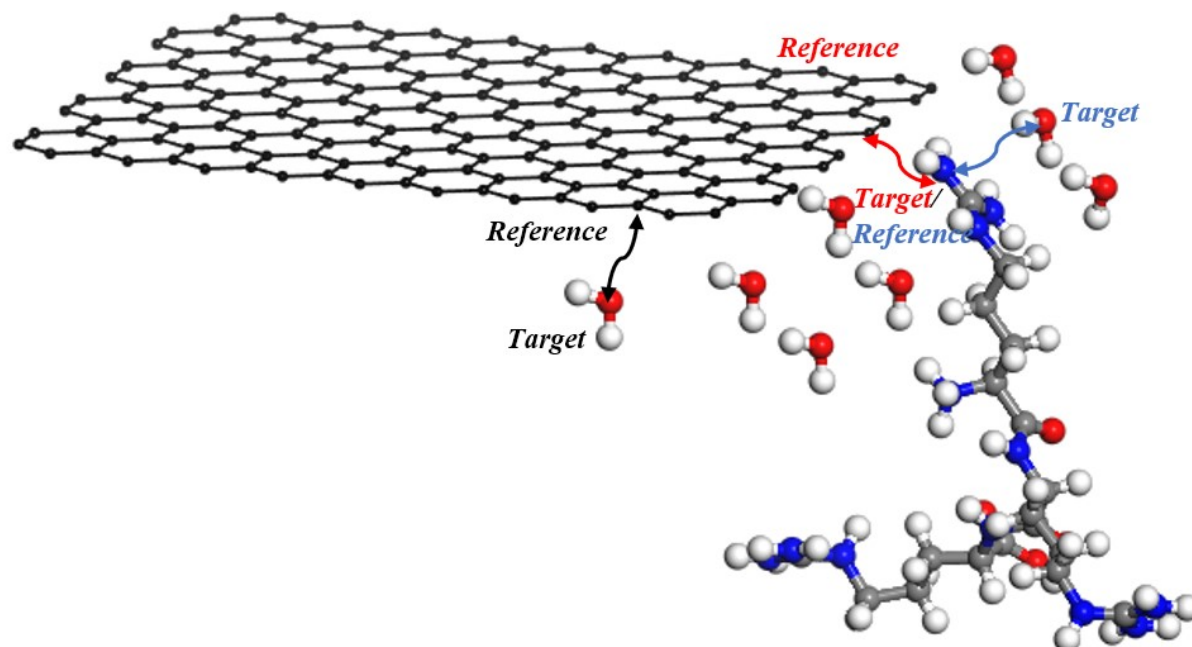

Supplement: d6cp00101g1.pdf [file d6cp00101g1.pdf]
